# Supplementary material
Source: Springer Nature journal article supplement (https://www.springermedizin.de/resource/supplementary/12889_2005_283_MOESM1_ESM.pdf/9500518)

**Housing design & materials and infrastructure condition**

**Household Composition and Process**  
Child and carer socio-demographic (including crowding) and socioeconomic status, household cleaning software

**Hygiene condition of household environment**

**Facilities for healthy living practices**

**Child skin infections**

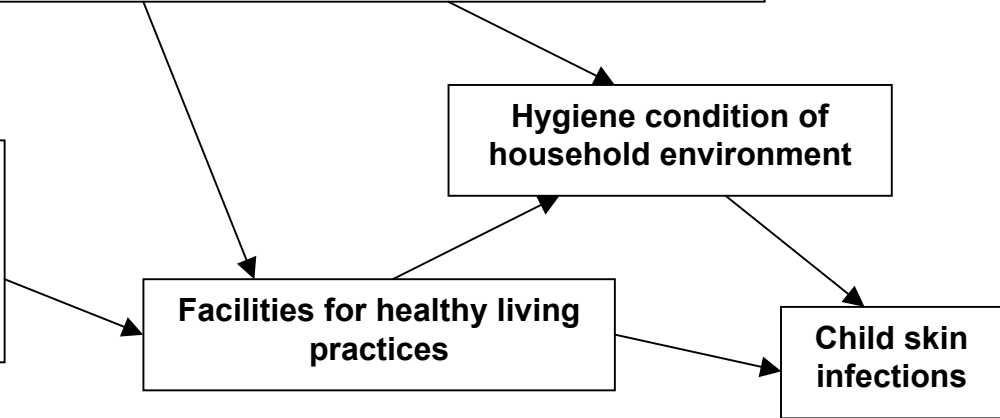

Supplement: MOESM1 [file 9500518]
